# Supplementary material
Source: publisher site journal article supplement (https://www.dovepress.com/get_supplementary_file.php?f=496086.docx)
Supplement: Supplementary file 1 [file get_supplementary_file.php]

**Dynamic Risk Status of Obstructive Sleep Apnea and Incidence of Chronic Obstructive Pulmonary Disease: Insights from a Nationally Prospective Cohort**

**Supplementary Materials**

**Supplementary Table S1** Baseline characteristics of the study population in the cross-sectional analysis

|  | **All participants** | | | | | **COPD patients with information on oxygen therapy status** | | |
| --- | --- | --- | --- | --- | --- | --- | --- | --- |
| **Total**  **(n=18505)** | **Percentage of Missing** | **Non COPD (n=16571)** | **COPD**  **(n=1934)** | **p value** | **Non oxygen therapy**  **(n=1461)** | **Oxygen therapy**  **(n=346)** | **p value** |
| Age, years | 64.0 (57.0, 75.0) |  | 64.0 (57.0, 75.0) | 67.0 (59.0, 77.0) | <0.001 | 66.0 (58.0, 76.0) | 73.0 (62.0, 80.0) | <0.001 |
| Male, n (%) | 7953 (43.0%) |  | 7230 (43.6%) | 723 (37.4%) | <0.001 | 538 (36.8%) | 130 (37.6%) | 0.795 |
| Race, n (%) |  | 0.3% |  |  | 0.026 |  |  | 0.742 |
| White/Caucasian | 12260 (66.5%) |  | 10932 (66.2%) | 1328 (68.7%) |  | 1001 (68.6%) | 244 (70.5%) |  |
| Black/African American | 4073 (22.1%) |  | 3658 (22.1%) | 415 (21.5%) |  | 318 (21.8%) | 69 (19.9%) |  |
| Other | 2114 (11.5%) |  | 1925 (11.7%) | 189 (9.8%) |  | 140 (9.6%) | 33 (9.5%) |  |
| Education, n (%) |  | 0.0% |  |  | <0.001 |  |  | 0.001 |
| Below High school | 4136 (22.4%) |  | 3451 (20.8%) | 685 (35.4%) |  | 499 (34.2%) | 144 (41.7%） |  |
| High school graduate | 5004 (27.0%) |  | 4470 (27.0%) | 534 (27.6%) |  | 394 (27.0%) | 103 (29.9%) |  |
| College or above | 9361 (50.6%) |  | 8647 (52.2%) | 714 (36.9%) |  | 568 (38.9%) | 98 (28.4%) |  |
| Marital status, n (%) |  | 0.1% |  |  | <0.001 |  |  | 0.04 |
| Married or partnered | 11376 (61.5%) |  | 10407 (62.9%) | 969 (50.2%) |  | 744 (51.1%) | 155 (44.9%) |  |
| Other status | 7108 (38.5%) |  | 6148 (37.1%) | 960 (49.8%) |  | 713 (48.9%) | 190 (55.1%) |  |
| Ever drinkers, n (%) | 10791 (58.3%) | 0.0% | 9894 (59.7%) | 897 (46.4%) | <0.001 | 719 (49.2%) | 126 (36.4%) | <0.001 |
| Smoking Status, n (%) |  | 0.4% |  |  | <0.001 |  |  | <0.001 |
| Never smokers | 8383 (45.5%) |  | 7954 (48.2%) | 429 (22.2%) |  | 337 (23.1%) | 54 (15.7%) |  |
| Ever smokers | 7357 (39.9%) |  | 6409 (38.8%) | 948 (49.1%) |  | 667 (45.7%) | 211 (61.5%) |  |
| Current smokers | 2686 (14.6%) |  | 2134 (12.9%) | 552 (28.6%) |  | 455 (31.2%) | 78 (22.7%) |  |
| Physical activity score | 9.0 (4.0, 15.0) |  | 9.0 (5.0, 15.0) | 6.0 (2.0, 9.0) | <0.001 | 7.0 (3.0, 10.0) | 2.0 (0.0, 7.0) | <0.001 |
| BMI, kg/m2 | 28.1 (24.7, 32.3) |  | 28.0 (24.7, 32.1) | 28.3 (24.3, 33.3) | 0.162 | 28.3 (24.3, 33.3) | 28.1 (23.6, 34.7) | 0.584 |
| HTN, n (%) | 11191 (60.5%) |  | 9777 (59.0%) | 1414 (73.1%) | <0.001 | 1040 (71.2%) | 286 (82.7%) | <0.001 |
| DM, n (%) | 4869 (26.3%) |  | 4208 (25.4%) | 661 (34.2%) | <0.001 | 479 (32.8%) | 129 (37.3%) | 0.111 |
| Cancer, n (%) | 2643 (14.3%) |  | 2258 (13.6%) | 385 (19.9%) | <0.001 | 277 (19.0%) | 81 (23.4%) | 0.062 |
| Heart diseases, n (%) | 4287 (23.1%) |  | 3416 (20.6%) | 862 (44.6%) | <0.001 | 589 (40.3%) | 213 (61.6%) | <0.001 |
| Stroke, n (%) | 1630 (8.8%) |  | 1273 (7.7%) | 357 (18.5%) | <0.001 | 247 (16.9%) | 82 (23.7%) | 0.003 |
| Nervous and psychiatric problems, n (%) | 3804 (20.6%) |  | 3007 (18.1%) | 797 (41.2%) | <0.001 | 584 (40.0%) | 151 (43.6%) | 0.212 |
| Sleep quality score | 3.0 (1.0, 4.0) | 0.9% | 2.0 (1.0, 4.0) | 4.0 (2.0, 6.0) | <0.001 | 4.0 (2.0, 5.0) | 4.0 (3.0, 6.0) | <0.001 |
| STOP-Bang score | 3.0 (2.0, 4.0) |  | 3.0 (2.0, 4.0) | 3.0 (3.0, 5.0) | <0.001 | 3.0 (3.0, 5.0) | 4.0 (3.0, 5.0) | 0.001 |
| High OSA risk, n (%) | 7175 (38.8%) |  | 6208 (37.5%) | 967 (50.0%) | <0.001 | 712 (48.7%) | 197 (56.9%) | 0.006 |

**Notes:**

**Abbreviations:** BMI, body mass index; COPD, chronic obstructive pulmonary disease; DM, diabetes mellitus; HTN: hypertension; OSA, obstructive sleep apnea.

**Supplementary Table S2** Association of OSA risk with the risks of incident oxygen therapy

|  | **STOP-Bang indicators** | **Unadjusted** | | **Adjusted 1a** | | **Adjusted 2b** | |
| --- | --- | --- | --- | --- | --- | --- | --- |
| **HR (95%CI)** | **p value** | **HR (95%CI)** | **p value** | **HR (95%CI)** | **p value** |
| All  (n=1191) | High OSA risk vs low OSA riskc | 1.150 (0.845, 1.566) | 0.372 | 1.226 (0.872, 1.723) | 0.241 | 1.102 (0.773, 1.572) | 0.591 |
| STOP-Bang score | 1.046 (0.938, 1.167) | 0.420 | 1.071 (0.943, 1.217) | 0.292 | 1.018 (0.890, 1.164) | 0.795 |
| Male  (n=439) | High OSA risk vs low OSA riskc | 1.071 (0.655, 1.752) | 0.784 | 1.087 (0.639, 1.848) | 0.759 | 0.927 (0.530, 1.622) | 0.791 |
| STOP-Bang score | 1.073 (0.892, 1.292) | 0.454 | 1.117 (0.898, 1.390) | 0.322 | 1.069 (0.846, 1.352) | 0.576 |
| Female  (n=752) | High OSA risk vs low OSA riskc | 1.056 (0.692, 1.611) | 0.801 | 1.094 (0.663, 1.806) | 0.725 | 0.991 (0.587, 1.671) | 0.972 |
| STOP-Bang score | 0.973 (0.837, 1.130) | 0.718 | 0.947 (0.789, 1.136) | 0.556 | 0.884 (0.729, 1.073) | 0.212 |

**Notes:**

**Abbreviations:** CI, confidence interval; COPD, chronic obstructive pulmonary disease; HR, hazard ratio; OSA, obstructive sleep apnea.

a: Adjusted for age, race, education, marital status, smoking status, drinking status, physical activity score and BMI;

b: Adjusted for age, race, education, marital status, smoking status, drinking status, physical activity score, BMI, HTN, DM, cancer, heart diseases, stroke, nervous and psychiatric problems, and sleep quality score;

c: Reference group

**Supplementary Table S3** Association of the change of OSA risk with the risks of incident oxygen therapy

|  | **Subgroups of baseline OSA risk** | **Reference groups** | **Unadjusted** | | **Adjusted 1a** | | **Adjusted 2b** | |
| --- | --- | --- | --- | --- | --- | --- | --- | --- |
| **HR (95%CI)** | **p value** | **HR (95%CI)** | **p value** | **HR (95%CI)** | **p value** |
| All  (n=824) | Low OSA risk | Stable vs increased OSA riskc | 0.948 (0.451, 1.993) | 0.889 | 0.812 (0.377, 1.747) | 0.595 | 1.018 (0.447, 2.320) | 0.966 |
| High OSA risk | Decreased vs Stable OSA riskc | 0.687 (0.300, 1.569) | 0.372 | 0.746 (0.314, 1.776) | 0.508 | 0.784 (0.318, 1.933) | 0.597 |
| Male  (n=286) | Low OSA risk | Stable vs increased OSA riskc | 2.717 (0.593, 12.443) | 0.198 | 2.321 (0.443, 12.151) | 0.319 | 1.553 (0.232, 10.387) | 0.650 |
| High OSA risk | Decreased vs Stable OSA riskc | 0.603 (0.177, 2.053) | 0.418 | 0.593 (0.160, 2.195) | 0.434 | 0.443 (0.109, 1.804) | 0.256 |
| Female  (n=538) | Low OSA risk | Stable vs increased OSA riskc | 0.626 (0.266, 1.474) | 0.283 | 0.509 (0.206, 1.257) | 0.143 | 0.685 (0.251, 1.870) | 0.460 |
| High OSA risk | Decreased vs Stable OSA riskc | 0.834 (0.265, 2.629) | 0.757 | 0.781 (0.198, 3.083) | 0.724 | 2.004 (0.337, 11.921) | 0.445 |

**Notes:**

**Abbreviations:** CI, confidence interval; COPD, chronic obstructive pulmonary disease; HR, hazard ratio; OSA, obstructive sleep apnea.

a: Adjusted for age, race, education, marital status, smoking status, drinking status, physical activity score and BMI;

b: Adjusted for age, race, education, marital status, smoking status, drinking status, physical activity score, BMI, HTN, DM, cancer, heart diseases, stroke, nervous and psychiatric problems, and sleep quality score;

c: Reference group

**Supplementary Table S4** Association of OSA risk with the risks of incident COPD in sensitivity analysis

|  | **STOP-Bang indicators** | **Unadjusted** | | **Adjusted 1a** | | **Adjusted 2b** | |
| --- | --- | --- | --- | --- | --- | --- | --- |
| **HR (95%CI)** | **p value** | **HR (95%CI)** | **p value** | **HR (95%CI)** | **p value** |
| All  (n=14398) | High OSA risk vs low OSA riskc | 1.396 (1.190, 1.637) | <0.001 | 1.402 (1.182, 1.664) | <0.001 | 1.265 (1.063, 1.505) | 0.008 |
| STOP-Bang score | 1.177 (1.107, 1.251) | <0.001 | 1.180 （1.102， 1.264） | <0.001 | 1.115 (1.039, 1.196) | 0.002 |
| Male  (n=6201) | High OSA risk vs low OSA riskc | 1.431 (1.106, 1.851) | 0.006 | 1.502 (1.145, 1.970) | 0.004 | 1.346 (1.020, 1.775) | 0.037 |
| STOP-Bang score | 1.241 (1.116, 1.382) | <0.001 | 1.285 (1.140, 1.448) | <0.001 | 1.199 (1.059, 1.357) | 0.004 |
| Female  (n=8197) | High OSA risk vs low OSA riskc | 1.515 (1.217, 1.886) | <0.001 | 1.463 (1.146, 1.868) | 0.002 | 1.278 (0.997, 1.637) | 0.053 |
| STOP-Bang score | 1.211 (1.116, 1.313) | <0.001 | 1.195 (1.085, 1.315) | <0.001 | 1.108 (1.003, 1.223) | 0.044 |

**Notes:**

**Abbreviations:** CI, confidence interval; COPD, chronic obstructive pulmonary disease; HR, hazard ratio; OSA, obstructive sleep apnea.

a: Adjusted for age, race, education, marital status, smoking status, drinking status, physical activity score and BMI;

b: Adjusted for age, race, education, marital status, smoking status, drinking status, physical activity score, BMI, HTN, DM, cancer, heart diseases, stroke, nervous and psychiatric problems, and sleep quality score;

c: Reference group

**Supplementary Table S5** Association of OSA risk with the risks of incident oxygen therapy in sensitivity analysis

|  | **STOP-Bang indicators** | **Unadjusted** | | **Adjusted 1a** | | **Adjusted 2b** | |
| --- | --- | --- | --- | --- | --- | --- | --- |
| **HR (95%CI)** | **p value** | **HR (95%CI)** | **p value** | **HR (95%CI)** | **p value** |
| All  (n=1191) | High OSA risk vs low OSA riskc | 1.150 (0.845, 1.566) | 0.372 | 1.224 (0.871, 1.719) | 0.247 | 1.079 (0.759, 1.534) | 0.672 |
| STOP-Bang score | 1.046 (0.938, 1.167) | 0.420 | 1.071 (0.942, 1.216) | 0.297 | 1.011 (0.885, 1.155) | 0.871 |
| Male  (n=439) | High OSA risk vs low OSA riskc | 1.071 (0.655, 1.752) | 0.784 | 1.072 (0.630, 1.822) | 0.799 | 0.887 (0.511, 1.539) | 0.672 |
| STOP-Bang score | 1.073 (0.892, 1.292) | 0.454 | 1.110 (0.893, 1.380) | 0.350 | 1.045 (0.831, 1.313) | 0.711 |
| Female  (n=752) | High OSA risk vs low OSA riskc | 1.056 (0.692, 1.611) | 0.801 | 1.102 (0.668, 1.819) | 0.704 | 1.013 (0.605, 1.694) | 0.962 |
| STOP-Bang score | 0.973 (0.837, 1.130) | 0.718 | 0.948 (0.790, 1.138) | 0.569 | 0.897 (0.740, 1.087) | 0.270 |

**Notes:**

**Abbreviations:** CI, confidence interval; COPD, chronic obstructive pulmonary disease; HR, hazard ratio; OSA, obstructive sleep apnea.

a: Adjusted for age, race, education, marital status, smoking status, drinking status, physical activity score and BMI;

b: Adjusted for age, race, education, marital status, smoking status, drinking status, physical activity score, BMI, HTN, DM, cancer, heart diseases, stroke, nervous and psychiatric problems, and sleep quality score;

c: Reference group

**Supplementary Table S6** Association of the change of OSA risk with the risks of incident COPD in sensitivity analysis

|  | **Subgroups of baseline OSA risk** | **Reference groups** | **Unadjusted** | | **Adjusted 1a** | | **Adjusted 2b** | |
| --- | --- | --- | --- | --- | --- | --- | --- | --- |
| **HR (95%CI)** | **p value** | **HR (95%CI)** | **p value** | **HR (95%CI)** | **p value** |
| All  (n=11177) | Low OSA risk | Stable vs increased OSA riskc | 0.542 （0.382， 0.769） | 0.001 | 0.530 (0.370, 0.757) | <0.001 | 0.578 (0.403, 0.828) | 0.003 |
| High OSA risk | Decreased vs Stable OSA riskc | 0.624 （0.428， 0.909） | 0.014 | 0.602 （0.411， 0.884） | 0.011 | 0.619 （0.422，0.909） | 0.016 |
| Male  (n=4851) | Low OSA risk | Stable vs increased OSA riskc | 0.627 (0.353, 1.115) | 0.112 | 0.582 (0.324, 1.047) | 0.079 | 0.620 (0.342, 1.124) | 0.126 |
| High OSA risk | Decreased vs Stable OSA riskc | 0.843 (0.514, 1.384) | 0.499 | 0.855 (0.515, 1.418) | 0.546 | 0.862 (0.518, 1.435) | 0.57 |
| Female  (n=6326) | Low OSA risk | Stable vs increased OSA riskc | 0.463 (0.294, 0.729) | 0.001 | 0.478 (0.299, 0.762) | 0.003 | 0.536 (0.333, 0.861) | 0.012 |
| High OSA risk | Decreased vs Stable OSA riskc | 0.401 (0.225, 0.715) | 0.002 | 0.387 (0.212, 0.704) | 0.003 | 0.388 (0.211, 0.713) | 0.004 |

**Notes:**

**Abbreviations:** CI, confidence interval; COPD, chronic obstructive pulmonary disease; HR, hazard ratio; OSA, obstructive sleep apnea.

a: Adjusted for age, race, education, marital status, smoking status, drinking status, physical activity score and BMI;

b: Adjusted for age, race, education, marital status, smoking status, drinking status, physical activity score, BMI, HTN, DM, cancer, heart diseases, stroke, nervous and psychiatric problems, and sleep quality score;

c: Reference group

**Supplementary Table S7** Association of the change of OSA risk with the risks of incident oxygen therapy in sensitivity analysis

|  | **Subgroups of baseline OSA risk** | **Reference groups** | **Unadjusted** | | **Adjusted 1a** | | **Adjusted 2b** | |
| --- | --- | --- | --- | --- | --- | --- | --- | --- |
| **HR (95%CI)** | **p value** | **HR (95%CI)** | **p value** | **HR (95%CI)** | **p value** |
| All  (n=824) | Low OSA risk | Stable vs increased OSA riskc | 0.948 (0.451, 1.993) | 0.889 | 0.813 (0.378, 1.749) | 0.600 | 0.886 (0.403, 1.948) | 0.767 |
| High OSA risk | Decreased vs Stable OSA riskc | 0.687 (0.300, 1.569) | 0.372 | 0.747 (0.314, 1.776) | 0.516 | 0.825 (0.335, 2.032) | 0.680 |
| Male  (n=286) | Low OSA risk | Stable vs increased OSA riskc | 2.717 (0.593, 12.443) | 0.198 | 2.293 (0.439, 11.965) | 0.606 | 1.569 (0.233, 10.577) | 0.772 |
| High OSA risk | Decreased vs Stable OSA riskc | 0.603 (0.177, 2.053) | 0.418 | 0.606 (0.164, 2.235) | 0.472 | 0.459 (0.115, 1.829) | 0.354 |
| Female  (n=538) | Low OSA risk | Stable vs increased OSA riskc | 0.626 (0.266, 1.474) | 0.283 | 0.507 (0.205, 1.251) | 0.162 | 0.563 (0.219, 1.447) | 0.265 |
| High OSA risk | Decreased vs Stable OSA riskc | 0.834 (0.265, 2.629) | 0.757 | 0.781 (0.198, 3.083) | 0.758 | 2.188 (0.367, 13.030) | 0.638 |

**Notes:**

**Abbreviations:** CI, confidence interval; COPD, chronic obstructive pulmonary disease; HR, hazard ratio; OSA, obstructive sleep apnea.

a: Adjusted for age, race, education, marital status, smoking status, drinking status, physical activity score and BMI;

b: Adjusted for age, race, education, marital status, smoking status, drinking status, physical activity score, BMI, HTN, DM, cancer, heart diseases, stroke, nervous and psychiatric problems, and sleep quality score;

c: Reference group
